# Supplementary material for: CircLRFN5 inhibits the progression of glioblastoma via PRRX2/GCH1 mediated ferroptosis
Source: PubMed Central journal article supplement (PMC9583503; doi:10.1186/s13046-022-02518-8), 2022-10-20

**a**

| ID                      | logFC             | AveExpr           | t                 | P.adj           |
|-------------------------|-------------------|-------------------|-------------------|-----------------|
| hsa_circ_0083682        | -5.5709726        | 10.2718034        | -6.1861616        | 0.00060315      |
| hsa_circ_0017169        | -5.0891032        | 3.77274303        | -11.441168        | 1.51E-05        |
| <b>hsa_circ_0031751</b> | <b>-4.9750868</b> | <b>4.25672825</b> | <b>-12.123892</b> | <b>1.05E-05</b> |
| hsa_circ_0027581        | -4.7975834        | 3.98269564        | -8.8774874        | 7.20E-05        |
| hsa_circ_0035024        | -4.5998243        | 10.4360579        | -7.1131316        | 0.00026989      |

**b**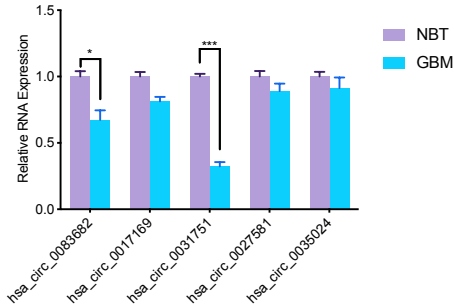

Supplement: 13046_2022_2518_MOESM1_ESM.pdf [file 13046_2022_2518_MOESM1_ESM.pdf]
