# Supplementary material for: CircLRFN5 inhibits the progression of glioblastoma via PRRX2/GCH1 mediated ferroptosis
Source: PubMed Central journal article supplement (PMC9583503; doi:10.1186/s13046-022-02518-8), 2022-10-20

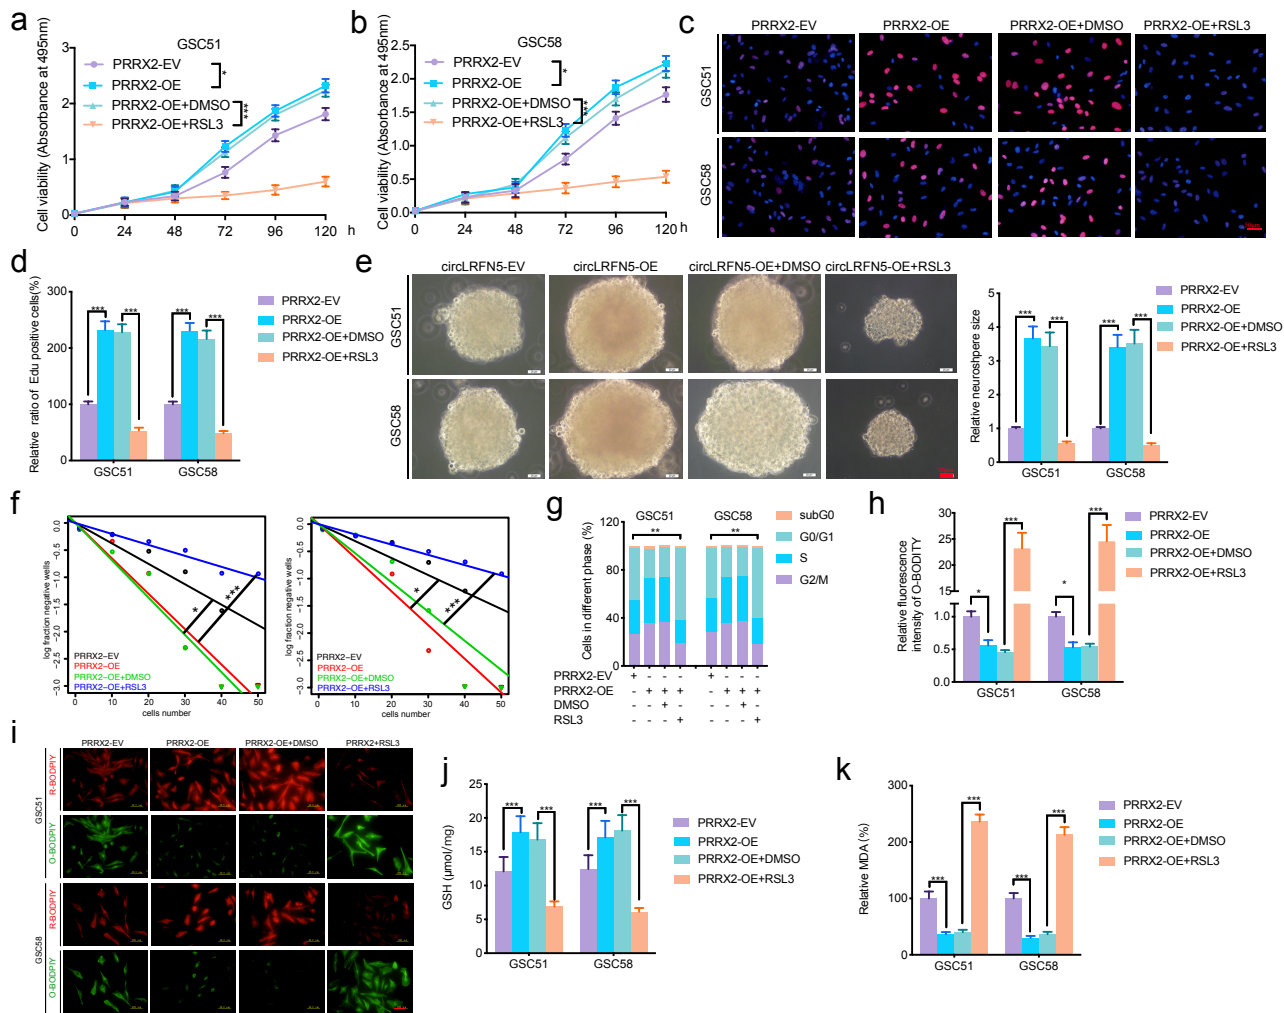

Supplement: 13046_2022_2518_MOESM4_ESM.pdf [file 13046_2022_2518_MOESM4_ESM.pdf]
